# Supplementary material for: Factors Influencing Pharmacokinetics of Tamoxifen in Breast Cancer Patients: A Systematic Review of Population Pharmacokinetic Models
Source: MDPI journal article supplement (doi:10.3390/biology12010051), 2022-12-28
Supplement: s1 [file s1]

Supplementary Table 1. Search Strategy

| Database       | Search Strategy                                                                                                                       | No. of Article |
|----------------|---------------------------------------------------------------------------------------------------------------------------------------|----------------|
| PUBMED         | (Pharmacokinetics OR Population pharmacokinetics OR PopPK OR NONMEM) AND<br>(Tamoxifen) AND (Breast neoplasms OR Breast Cancer)       | 724            |
| Web of Science | (Pharmacokinetics OR Population pharmacokinetics OR PopPK OR NONMEM) AND<br>(Tamoxifen) AND (Breast neoplasms OR Breast Cancer)       | 551            |
| SCOPUS         | (Pharmacokinetics OR “Population pharmacokinetics” OR PopPK OR NONMEM) AND<br>(Tamoxifen) AND (“Breast neoplasms” OR “Breast Cancer”) | 736            |
